# Supplementary material
Source: publisher figshare collection journal article supplement (https://acs.figshare.com/ndownloader/files/9486694)
Supplement: Supplementary file 1 [file 9486694]

Supporting Information

# **Low-Field Dynamic Magnetic Separation by Self-Fabricated Magnetic Meshes for Efficient Heavy Metal Removal**

Xiangxia Wei<sup>†</sup>, Pon Janani Sugumaran<sup>†</sup>, Erwin Peng, Xiao Li Liu<sup>‡</sup>, and Jun Ding\*

Department of Materials Science and Engineering, National University of Singapore,  
117575, Singapore

Email: [msedingi@nus.edu.sg](mailto:msedingi@nus.edu.sg)

## **Present Address:**

<sup>‡</sup>National Center for Nanoscience and Technology (NCNST), 100190 Beijing, P. R. China  
(X.L.L)

### Fabrication of the magnetic filter by 3D printing

The magnetic filter with different layers in the main text was printed by a simple and cheap three-dimensional printer (3Dison Multi printer equipped with a ROKIT. Inc. extruder). The feedstock paste was loaded in a 10 mL plastic syringe, and the printing was driven by the rotating belt. The fabrication process consists of the paste preparation and post-processing. Additionally, the formulation of the as-prepared homogeneous paste for printing is summarized in Table S1.

Moreover, rheological properties of the aqueous pastes were shown in Figure S1a. Obviously, the apparent viscosity decreases linearly with shear rate on a logarithmic scale, exhibiting a shear-thinning behavior which facilitates the formation of a smooth filament. Additionally, thermogravimetric study was performed by heating up to 800 °C as illustrated in Figure S1b. The weight loss is attributed to the water evaporation and organic removal, including plasticizer PEG-400, binder PVA, and a small amount of dispersant.

**Table S1** The paste composition of magnetic filter for extrusion-based 3D printing.

|            | NiO  | ZnO  | $\alpha$ -Fe <sub>2</sub> O <sub>3</sub> | Binder Solution <sup>a</sup> |
|------------|------|------|------------------------------------------|------------------------------|
| Weight (g) | 2.46 | 1.78 | 8.76                                     | 5.0 g (~6 mL)                |

<sup>a</sup>The binder solution is PVA aqueous solution (12.5 wt%) with a small amount of PEG-400 as plasticizer and Solspers 20000 as dispersant.

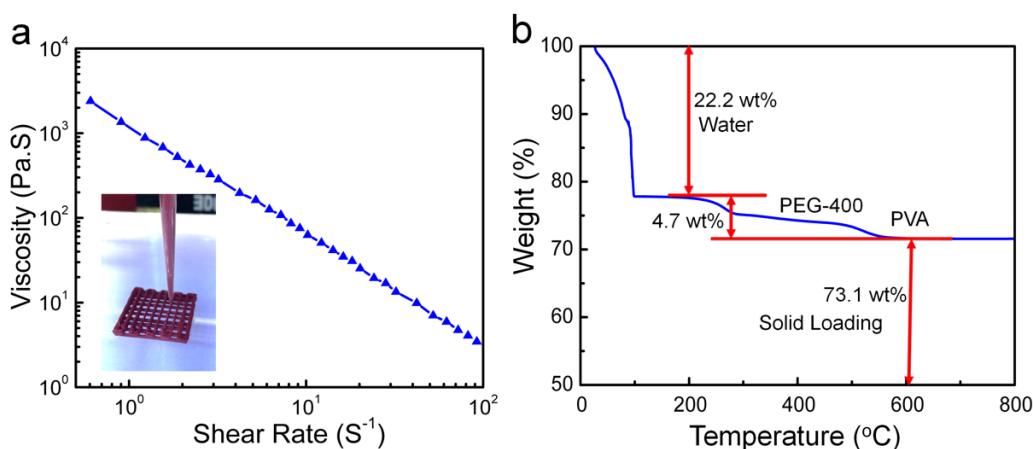

**Figure S1** (a) Apparent viscosity as a function of shear rate of the printable paste. The inset shows the as-printed mesh. (b) TGA results of the paste heated at a ramp of 10 °C min<sup>-1</sup>.

### EDX analysis of the magnetic filter

To verify the composition of printed magnetic filter after heat treatment, EDX analysis was performed and confirmed the presence of Ni, Zn, Fe, and O. In the quantitative analyses the oxygen was omitted, and the composition of Ni, Zn, and Fe showed close similarity to the stoichiometric value calculated from the feed weight (Table S2).

**Table S2** The element composition of magnetic filter after heat treatment.

| Atomic composition (%)            | Ni   | Zn   | Fe   |
|-----------------------------------|------|------|------|
| Measured value                    | 22.3 | 12.7 | 65.0 |
| Stoichiometric value <sup>a</sup> | 20.0 | 13.3 | 66.7 |

<sup>a</sup>Calculated from the weight ratio of the feed precursor powder.

### XPS analysis of the magnetic filter

The XPS spectrum (Figure S2) on the printed filter after sintering indicated the presence of four elements peaks on the surface: Zn 2p, Ni 2p, Fe 2p, and O 1s. No other elements were detected within the detection limit. The C 1s peak (284.6 eV) was used as reference for the binding energy correction. XPS results clearly indicate the successful formation of ferrite phases after annealing.

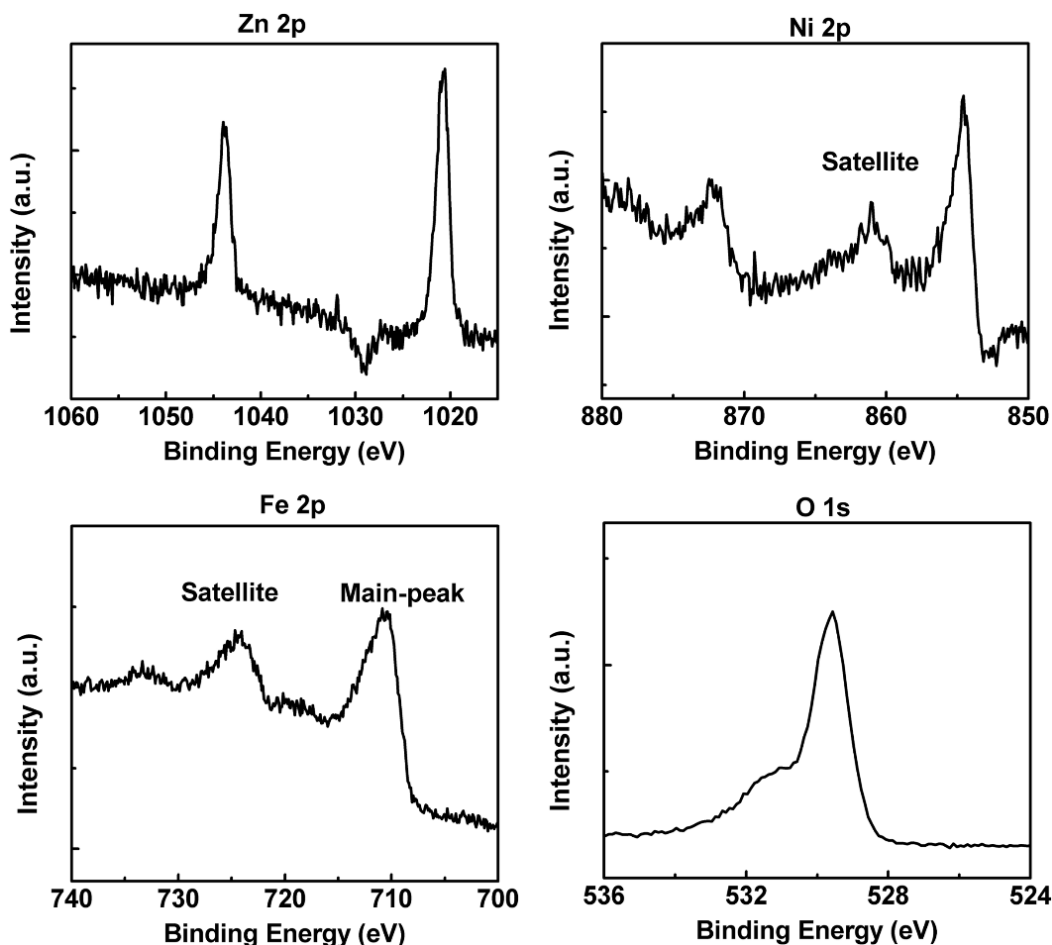

**Figure S2** X-ray photoelectron spectra of printed magnetic filter after sintering at 1300 °C.

### Synthesis of iron oxide nanoparticles

$\text{Fe}_3\text{O}_4$  nanoparticles were prepared by a well-established thermal decomposition method. Iron(III) acetylacetonate and oleic acid were added to benzyl ether, and magnetically stirred under a flow of nitrogen. The reaction mixture was slowly heated to 165 °C, then heated to reflux for 30 min. The particle size was adjusted by varying the heating temperature and reaction time. Subsequent, the obtained hydrophobic  $\text{Fe}_3\text{O}_4$  nanoparticles were transferred to water via a ligand-exchange reaction whereby PAA displaced as a surfactant. The same procedure was used to modify different sized  $\text{Fe}_3\text{O}_4$  nanoparticles. At the same time, FT-IR spectrum shown in Figure S3 was performed to verify the successful surface modification by PAA.

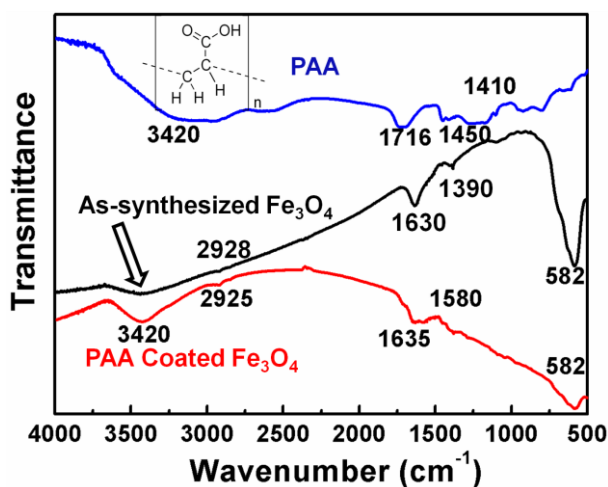

**Figure S3** FT-IR spectrum of the PAA (Mw = 1800), as-synthesized  $\text{Fe}_3\text{O}_4$  nanoparticles, and PAA-coated  $\text{Fe}_3\text{O}_4$  nanocomposites.

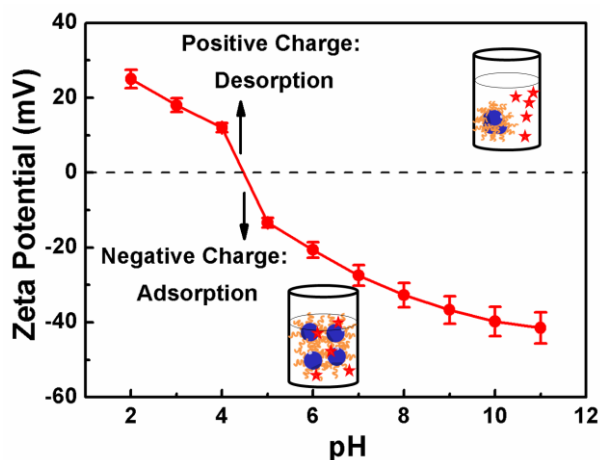

**Figure S4** Zeta potential of PAA-coated  $\text{Fe}_3\text{O}_4$  nanocomposites.

### Adsorption behavior of iron oxide nanoparticles

The adsorption behaviors of Pb(II) on Fe<sub>3</sub>O<sub>4</sub> nanocomposites were fitted by the pseudo-second-order kinetic model and Langmuir isotherm model with parameters summarized in Table S3. The maximum adsorption capacity was compared with other works in the literature (Table S4).

**Table S3** Summary of PAA-coated Fe<sub>3</sub>O<sub>4</sub> nanocomposites on Pb(II) adsorption behavior (pH 7.0).

| Samples | Pb(II) adsorption                           |                             |       |                           |                             |       |
|---------|---------------------------------------------|-----------------------------|-------|---------------------------|-----------------------------|-------|
|         | Pseudo-second-order kinetic model           |                             |       | Langmuir model            |                             |       |
|         | $k$ (g mg <sup>-1</sup> min <sup>-1</sup> ) | $q_e$ (mg g <sup>-1</sup> ) | $R^2$ | $b$ (L mg <sup>-1</sup> ) | $q_m$ (mg g <sup>-1</sup> ) | $R^2$ |
| 1       | 0.0037                                      | 107.52                      | 0.999 | 0.025                     | 454.55                      | 0.998 |
| 2       | 0.0038                                      | 117.65                      | 0.999 | 0.029                     | 476.19                      | 0.998 |

**Table S4** Comparison of lead adsorption capacities.<sup>1-7</sup>

| Adsorbents                                                     | Pb(II) concentration range (mg L <sup>-1</sup> ) | $q_m$ (mg g <sup>-1</sup> ) | Reference |
|----------------------------------------------------------------|--------------------------------------------------|-----------------------------|-----------|
| MnFe <sub>2</sub> O <sub>4</sub> -MoS <sub>2</sub> -carbon dot | 10-1000                                          | 588.24                      | 1         |
| CoFe <sub>2</sub> O <sub>4</sub> -MoS <sub>2</sub> -carbon dot |                                                  | 660.67                      |           |
| Acetoacetanilide-Fe <sub>3</sub> O <sub>4</sub>                | 50-400                                           | 392.2                       | 2         |
| GO-MnFe <sub>2</sub> O <sub>4</sub> nanohybrids                | 1-400                                            | 673                         | 3         |
| Fe <sub>3</sub> O <sub>4</sub> @DAPF                           | 10-100                                           | 83.3                        | 4         |
| $\alpha$ -Fe <sub>2</sub> O <sub>3</sub> nanoboxes             | 40-1000                                          | 900                         | 5         |
| Fe <sub>3</sub> O <sub>4</sub> /Humic acid                     | 0.01-5                                           | 97.7                        | 6         |
| Fe <sub>3</sub> O <sub>4</sub> /EDTA                           | 1-100                                            | 102.2                       | 7         |
| Fe <sub>3</sub> O <sub>4</sub> /PAA                            | 10-450                                           | 476                         | Our work  |

### Effect of pH, temperature, and the amount of adsorbents

The effect of pH on heavy metal adsorption (e.g., Pb(II)) is presented in Figure S5a. As we can see, adsorption capacity increased with pH. However, the adsorption at pH above 7.0 decreased due to the formation of precipitation. Moreover, as illustrated in Figure S5b, the adsorption capacity gradually increased up to the optimum dosage (2 mg), beyond which the capacity did not change much due to a fixed number of adsorption sites. Temperature still had an influence on the adsorption as shown in Figure S5c. It was found that lead adsorption increased with increase in temperature resulted from the diffusion of the solution.

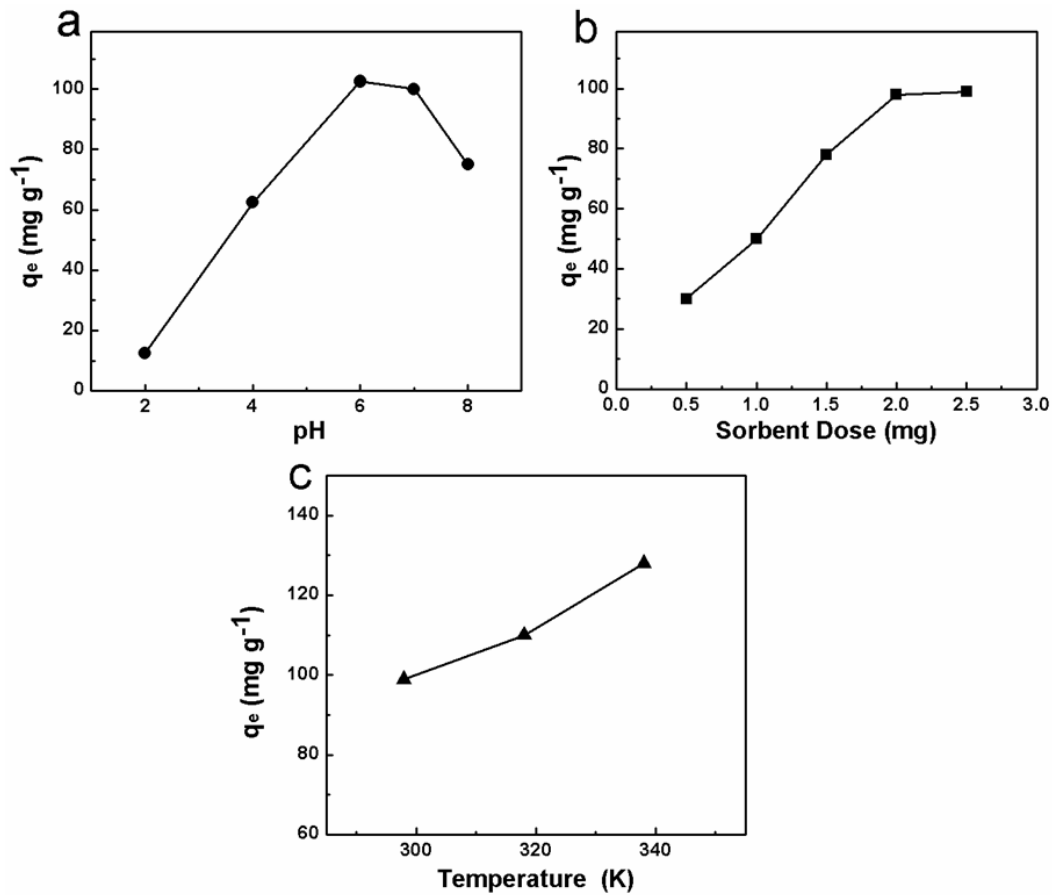

**Figure S5** (a) Adsorption of Pb(II) ions on  $\text{Fe}_3\text{O}_4$  nanocomposites at different pH values, with the initial concentration of 10 mg L<sup>-1</sup>, and adsorbent dose of 2 mg. (b) Adsorption of Pb(II) ions on  $\text{Fe}_3\text{O}_4$  nanocomposites in different amount from 0.5 mg to 3.0 mg, Pb(II) initial concentration was 10 mg L<sup>-1</sup> at pH 7.0. (c) Adsorption of Pb(II) ions on  $\text{Fe}_3\text{O}_4$  nanocomposites at 298, 318, 338 K, with the initial concentration of 10 mg L<sup>-1</sup>, and adsorbent dose of 2 mg at pH 7.0.

### Adsorption mechanism

As illustrated in Figure S6a, the FT-IR peak of carbonyl groups stretching at  $1635\text{ cm}^{-1}$  shifts to  $1570\text{ cm}^{-1}$  after adsorption, Pb(II) for example. Also, XPS spectra show two clear peaks at binding energy of 138.5 and 143.4 eV corresponding to Pb 4f after adsorption. Meanwhile, as the deconvoluted C1s spectrum shown in Figure S6c and d, the peaks of C-O-H and C=O bond after adsorption clearly shift to higher binding energy at 286.3 and 288.7 eV, respectively. The results further confirm that carbonyl groups are involved in the lead uptake, which are consistent with FT-IR analysis.

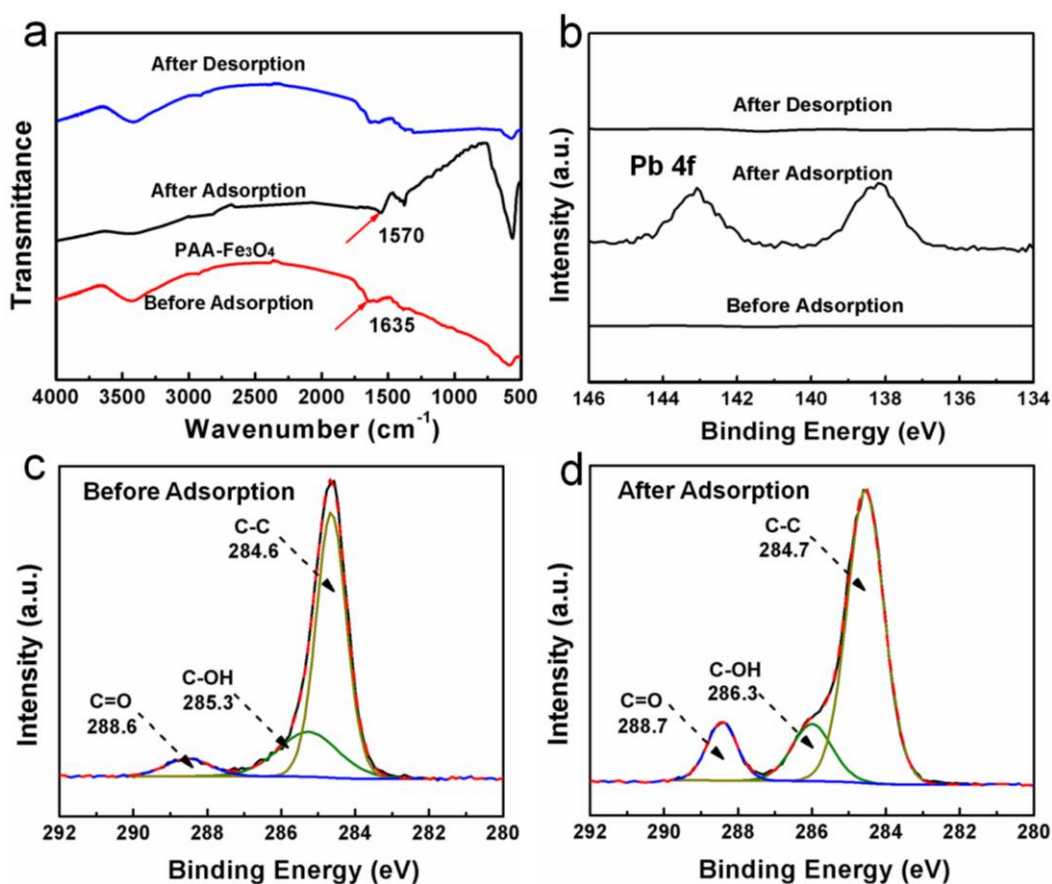

**Figure S6** (a) FT-IR spectra of PAA-coated  $\text{Fe}_3\text{O}_4$  nanoparticles before adsorption, after exposure to Pb(II) for 0.5 h, and after subsequent desorption in 0.1 M HCl. (b) XPS Pb 4f spectra of PAA-coated  $\text{Fe}_3\text{O}_4$  nanoparticles before adsorption, after exposure to Pb(II) for 0.5 h, and after subsequent desorption in 0.1 M HCl. High resolution XPS spectra of PAA-coated  $\text{Fe}_3\text{O}_4$  nanoparticles: C1s (c) before and (d) after Pb(II) adsorption.



The concentration of  $\text{Fe}_3\text{O}_4$  nanoparticles in the filter

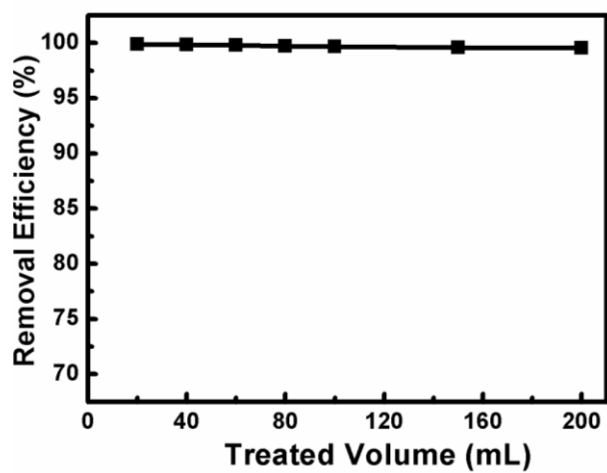

**Figure S7** Removal efficiency of  $\text{Fe}_3\text{O}_4$  nanoparticles (24 nm) with a high concentration of  $500 \text{ mg L}^{-1}$  when flowed through a single magnetic mesh with 20 layers.

### Fabrication of nonmagnetic filter ( $\alpha$ -Fe<sub>2</sub>O<sub>3</sub>) by 3D printing

The nonmagnetic filter was still shaped into 3D structures by extrusion 3D printing. Similarly, the as-prepared homogeneous paste was characterized by rheological behavior and thermogravimetric study as shown in Figure S8a and b. After post heat treatment, the measured magnetization by VSM (Figure S8c) was zero, indicating the nonmagnetic properties. Lastly, its phase was confirmed by the XRD analysis in Figure S8d.

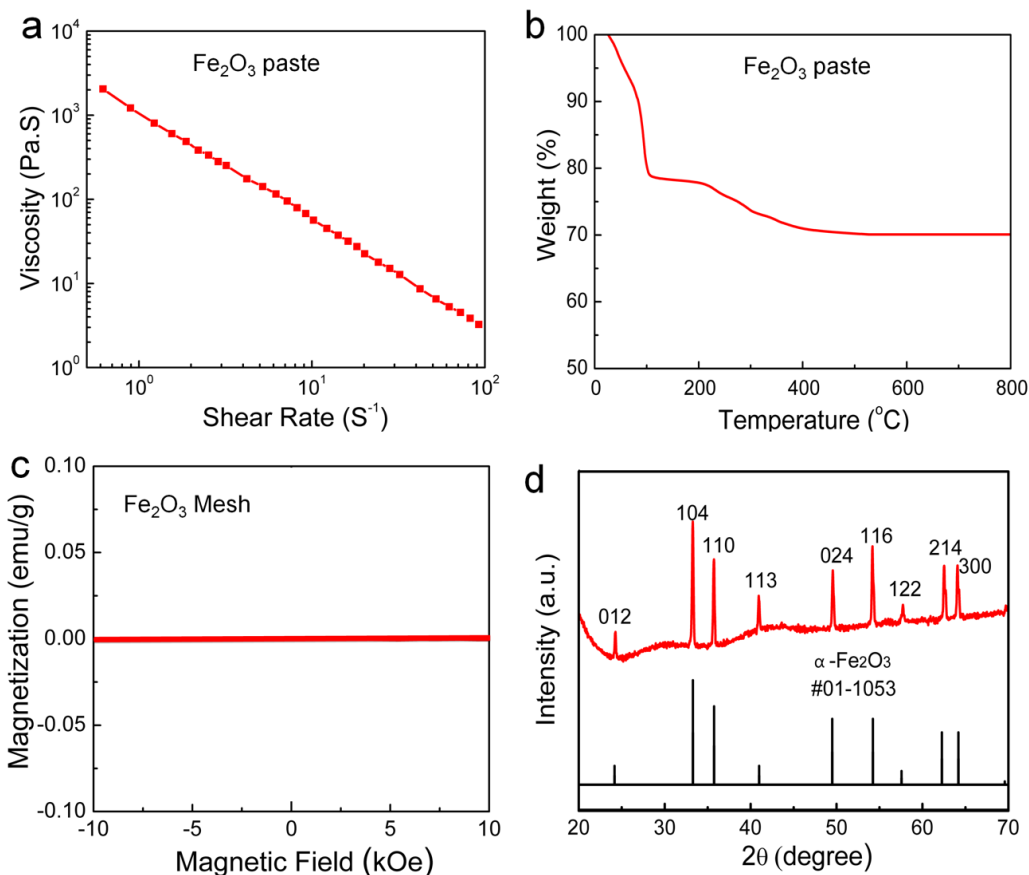

**Figure S8** (a) Apparent viscosity as a function of shear rate of the prepared  $\text{Fe}_2\text{O}_3$  paste for printing. (b) TGA results of the above paste heated at a ramp of  $10\text{ }^\circ\text{C min}^{-1}$  in nitrogen. (c) Magnetic hysteresis loops of the fabricated  $\text{Fe}_2\text{O}_3$  mesh after heat treatment. (d) XRD patterns of the fabricated  $\text{Fe}_2\text{O}_3$  mesh after heat treatment.

Reference:

- (1) Wang, J.; Zhang, W.; Yue, X.; Yang, Q.; Liu, F.; Wang, Y.; Zhang, D.; Li, Z.; Wang, J. One-Pot Synthesis of Multifunctional Magnetic Ferrite–MoS<sub>2</sub>–Carbon Dot Nanohybrid Adsorbent for Efficient Pb(II) Removal. *J. Mater. Chem. A* **2016**, *4*, 3893-3900.
- (2) Sharma, R. K.; Puri, A.; Monga, Y.; Adholeya, A. Acetoacetanilide-Functionalized Fe<sub>3</sub>O<sub>4</sub> Nanoparticles for Selective and Cyclic Removal of Pb<sup>2+</sup> Ions from Different Charged Wastewaters. *J. Mater. Chem. A* **2014**, *2*, 12888-12898.
- (3) Kumar, S.; Nair, R. R.; Pillai, P. B.; Gupta, S. N.; Iyengar, M. A.; Sood, A. K. Graphene Oxide-MnFe<sub>2</sub>O<sub>4</sub> Magnetic Nanohybrids for Efficient Removal of Lead and Arsenic from Water. *ACS Appl. Mater. Interfaces* **2014**, *6*, 17426-17436.
- (4) Venkateswarlu, S.; Yoon, M., Core-Shell Ferromagnetic Nanorod Based on Amine Polymer Composite (Fe<sub>3</sub>O<sub>4</sub>@DAPF) for Fast Removal of Pb(II) from Aqueous Solutions. *ACS Appl. Mater. Interfaces* **2015**, *7*, 25362-25372.
- (5) Mo, Q.; Wei, J.; Jiang, K.; Zhuang, Z.; Yu, Y. Hollow  $\alpha$ -Fe<sub>2</sub>O<sub>3</sub> Nanoboxes Derived from Metal–Organic Frameworks and Their Superior Ability for Fast Extraction and Magnetic Separation of Trace Pb<sup>2+</sup>. *ACS Sustain. Chem. Eng.* **2016**, *5*, 1476-1484.
- (6) Liu, J. F.; Zhao, Z. S.; Jiang, G. B. Coating Fe<sub>3</sub>O<sub>4</sub> Magnetic Nanoparticles with Humic Acid for High Efficient Removal of Heavy Metals in Water. *Environ. Sci. Technol.* **2008**, *42*, 6949-6454.
- (7) Huang, Y.; Keller, A. A. EDTA Functionalized Magnetic Nanoparticle Sorbents for Cadmium and Lead Contaminated Water Treatment. *Water. Res.* **2015**, *80*, 159-168.
